# Supplementary material for: Green preparation of anti-inflammation an injectable 3D porous hydrogel for speeding up deep second-degree scald wound healing
Source: Royal Society of Chemistry journal article supplement (doi:10.1039/d0ra04990e), 2020-01-01
Supplement: d0ra04990e1.pdf [file d0ra04990e1.pdf]

## Electronic supplementary information

### **Green preparation of anti-inflammation injectable 3D porous hydrogel for speed up deep second-degree scald wound healing**

*Xiao Xu<sup>†</sup>, Lin Che<sup>†</sup>, Lin Xu, Doudou Huang, Jiashen Wu, Zebang Du, Yuchun Lin, Xiaoqian Hu, Qingliang Zhao<sup>\*</sup>, Zhongning Lin<sup>\*</sup>, and Ling Xu<sup>\*</sup>*

State Key Laboratory of Molecular Vaccinology and Molecular Diagnostics & Center for Molecular Imaging and Translational Medicine, School of Public Health, Xiamen University, Xiamen 361102, China

<sup>†</sup>These authors contributed equally to this work.

<sup>\*</sup>Corresponding author.

E-mail: zhaoql@xmu.edu.cn, linzhn@xmu.edu.cn, and lingxu@xmu.edu.cn.

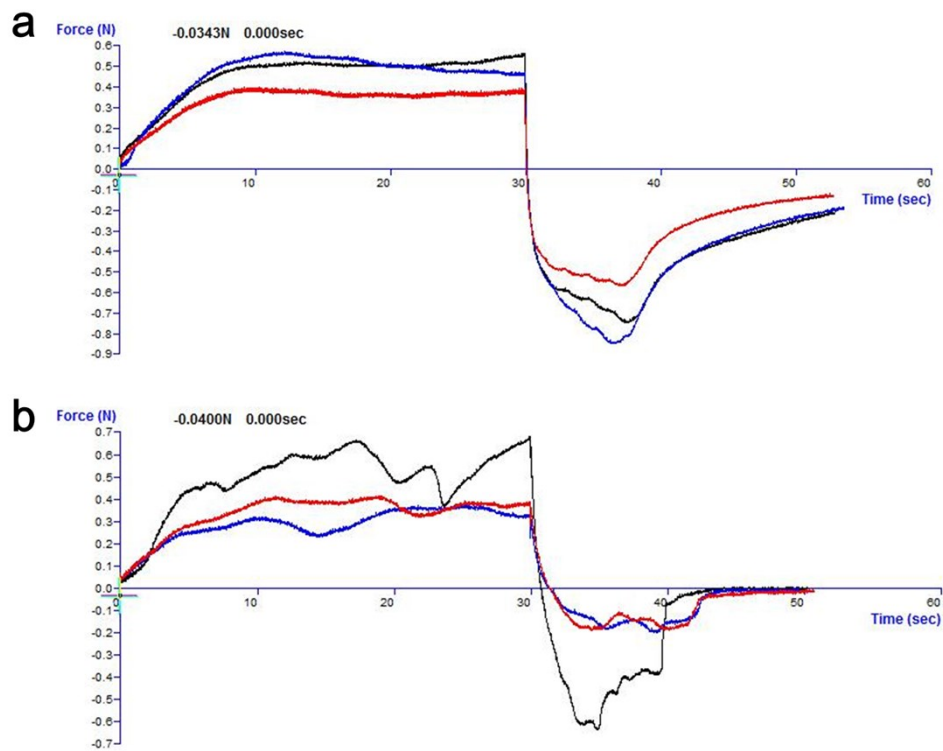

**Figure S1.** The compressive strength of GSC213 (BLACK), GSC222 (BLUE), and GSC231 (RED) for (a) before and (b) after EB radiation.

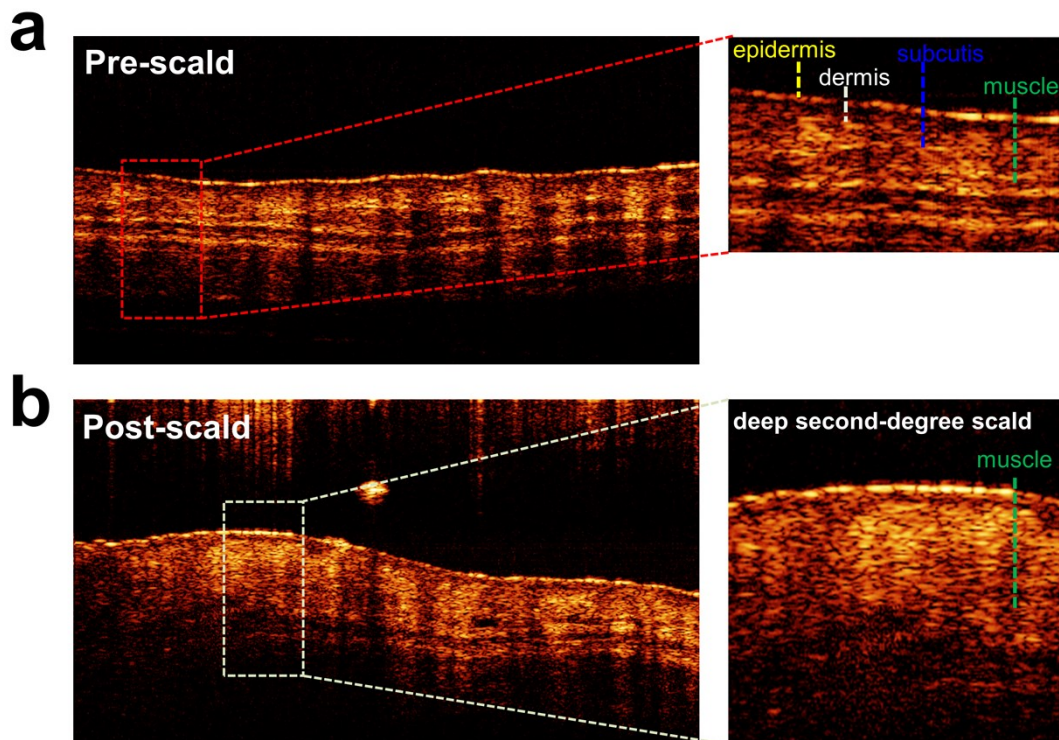

**Figure S2.** OCT images of the (a) pre-scald and (b) post-scald wound.

## References

1. L. Che, H. Yao, C.-L. Yang, N.-J. Guo, J. Huang, Z.-L. Wu, L.-Y. Zhang, Y.-Y. Chen, G. Liu, Z.-N. Lin and Y.-C. Lin, *Nanotoxicology*, 2020, **14**, 162-180.
2. S. Zhang, L. Che, C. He, J. Huang, N. Guo, J. Shi, Y. Lin and Z. Lin, *Cell Death Dis.*, 2019, **10**, 523.
3. Y. Huang, M. Li, D. Huang, Q. Qiu, W. Lin, J. Liu, W. Yang, Y. Yao, G. Yan, N. Qu, V. V. Tuchin, S. Fan, G. Liu, Q. Zhao and X. Chen, *Small*, 2019, **15**, e1902346.
